# Supplementary material for: Prediction of the Malignancy of a Breast Lesion Detected on Breast Ultrasound: Radiomics Applied to Clinical Practice
Source: MDPI journal article supplement (doi:10.3390/cancers15030964), 2023-02-02
Supplement: s1 [file s1]

# Prediction of the Malignancy of a Breast Lesion Detected on Breast Ultrasound: Radiomics Applied to Clinical Practice

Luca Nicosia, Filippo Pesapane, Anna Carla Bozzini, Antuono Latronico, Anna Rotili, Federica Ferrari, Giulia Signorelli, Sara Raimondi, Silvano Vignati, Aurora Gaeta, Federica Bellerba, Daniela Origgi, Paolo De Marco, Giuseppe Castiglione Minischetti, Claudia Sangalli, Marta Montesano, Simone Palma and Enrico Cassano

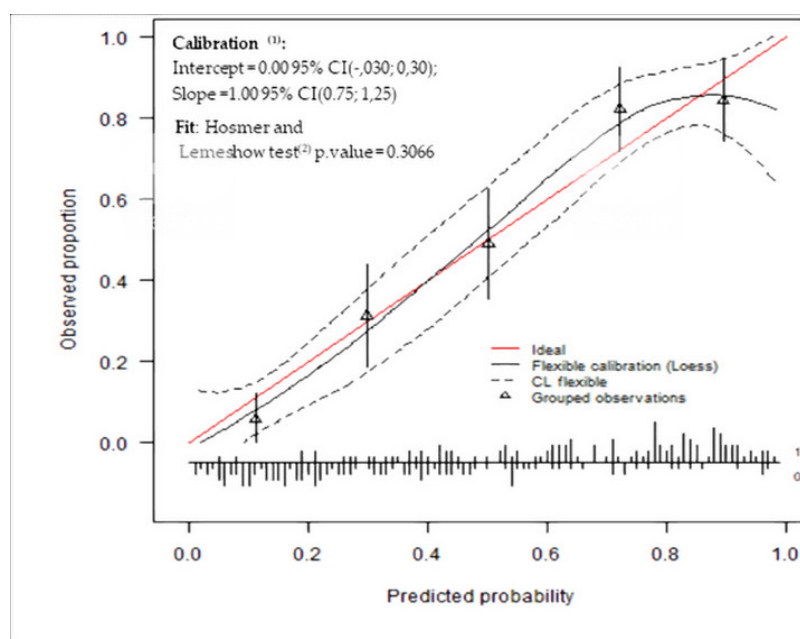

**Figure S1.** Evaluation of good fitting of radiomic model with Hosmer test and training group. Calibration of radiomic model. (1) Calibration intercept: a value close to 0 indicates good calibration. Calibration slope: a value close to 1 denotes perfect calibration. (2) Hosmer test:  $p$ -value  $> 0.05$  evidence of good fit.

**Table S1.** Strength of agreement among four radiologists (Fleiss's K).

| Operators                          | Estimate | Lower  | Upper  |
|------------------------------------|----------|--------|--------|
| Expert Operators 1 vs 2            | 0.8791   | 0.8248 | 0.9235 |
| Less experienced operators 3 vs 4  | 0.8303   | 0.7726 | 0.885  |
| Operator 1 vs 3                    | 0.7145   | 0.6404 | 0.7862 |
| Operator 2 vs 3                    | 0.7146   | 0.6334 | 0.7911 |
| Operator 1 vs 4                    | 0.6664   | 0.5874 | 0.7479 |
| Operator 2 vs 4                    | 0.6444   | 0.5606 | 0.7259 |
| Inter-rater Agreement (Fleiss's K) | 0.7413   | 0.6892 | 0.7936 |
